# Supplementary material
Source: Springer Nature journal article supplement (https://www.springermedizin.de/resource/supplementary/12936_2011_1950_MOESM1_ESM.pdf/9542116)

# BANGLADESH

Malaria Endemity

▧ Low Endemic

▨ High Endemic

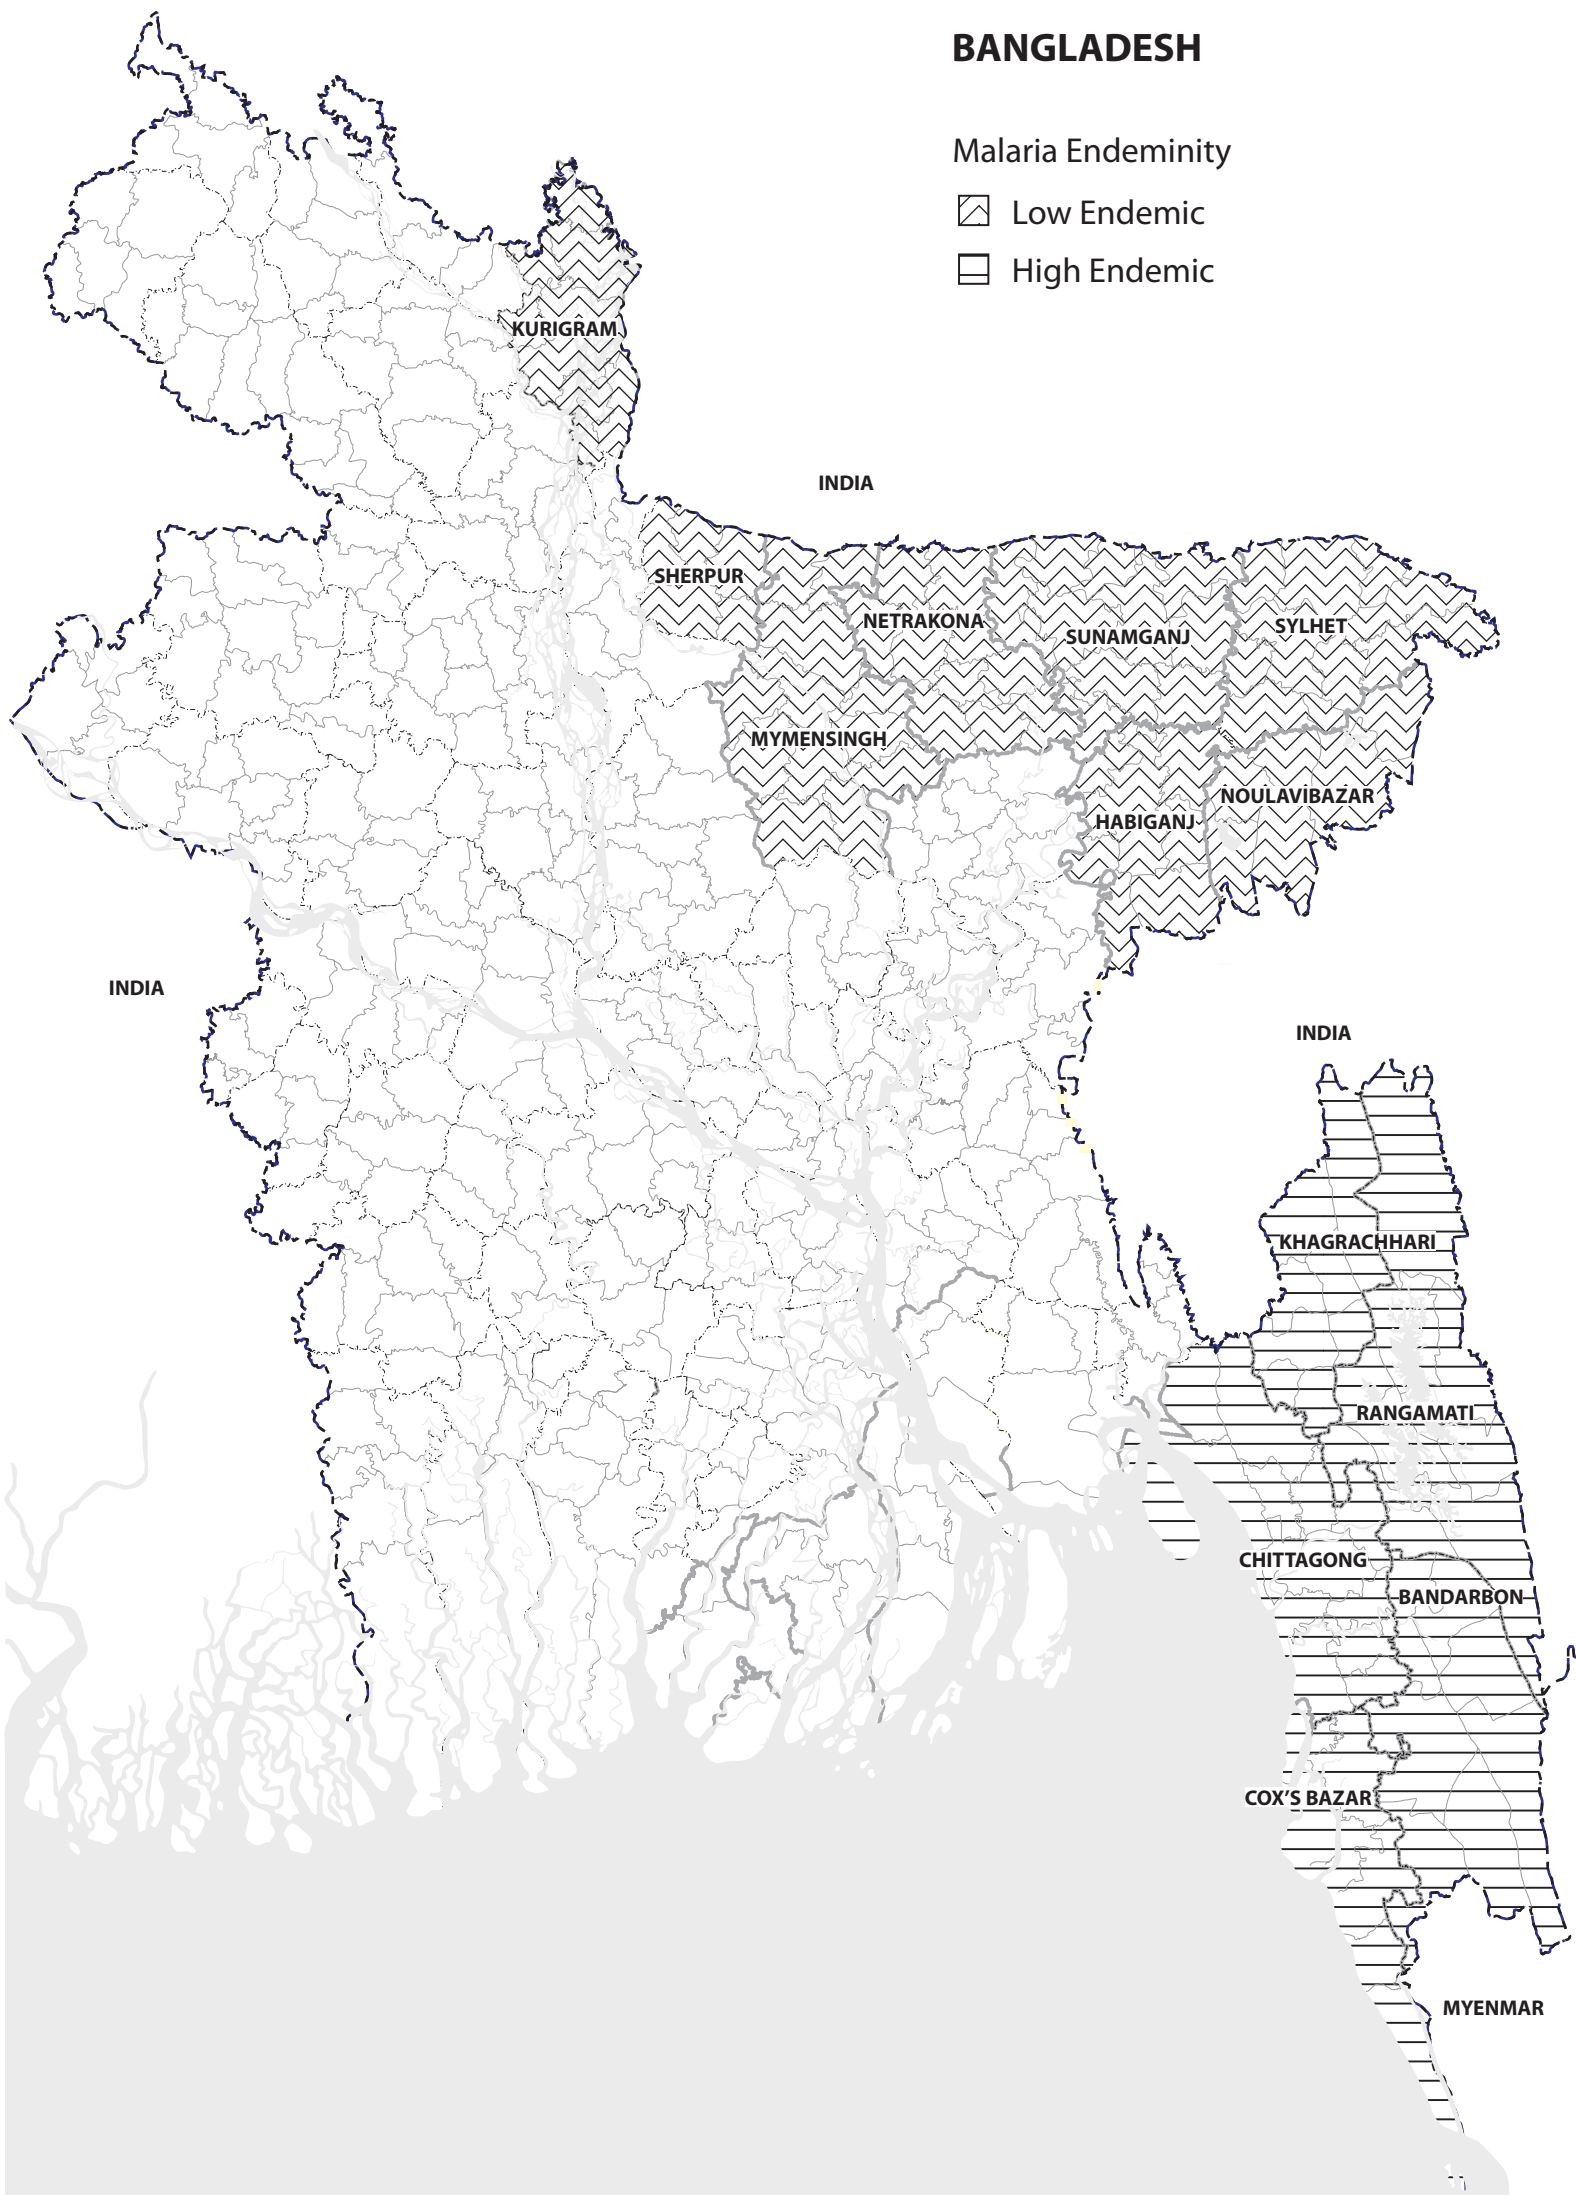

Supplement: MOESM1 [file 9542116]
